# Supplementary material for: Enhancing protection against vector-borne diseases in forcibly displaced communities: evaluating the efficacy of spatial repellents for cutaneous leishmaniasis control in North-East Syria
Source: Research Square preprint supplement (doi:10.21203/rs.3.rs-6664771/v1), 2025-05-20
Supplement: Supplementary file 1 [file cd0577442443bc80113dee6a.docx]

**Additional files**

Additional file 1: Tables S1 and S2. The tables provide the incidence of cutaneous leishmanisis in each study camp, using a cut off of 2 and 4 months diagnosis for new infections. We see that in either case, the disease incidence rate is significantly higher in control camps than in intervention camps.

**Additional file 1: Table S1.** Incidence of cutaneous leishmaniasis disaggregated by study camp from June 2021 – April 2022 (using 2-months diagnosis cut-off).

|  | **Population December 2020 – before intervention**† | **Population March 2022 – after intervention**† | **Average population during the study follow-up (Dec 2020 to March 2022)** | **New cases of leishmaniasis during the study follow-up (June 2021 to April 2022)** | **Incidence rate per 1,000** | **IRR [95% CI; p-value]** |
| --- | --- | --- | --- | --- | --- | --- |
| **Control arm** | **5412** | **8536** | **6974** | **69** | **9.9** |  |
| Royan Camp | 507 | 2219 | 1363 | 5 | 3.7 |  |
| Sahlat Al Banat Camp | 1387 | 3232 | 2310 | 47 | 20.4 |  |
| Tel Elsamen Camp | 3518 | 3085 | 3302 | 17 | 5.1 |  |
| **Intervention arm** | **11060** | **11800** | **11430** | **59** | **5.2** | **0.52 [0.37-0.74]; p<0.0001** |
| Tawihena camp | 2538 | 3421 | 2980 | 23 | 7.7 |  |
| Mahmoudli camp | 8522 | 8379 | 8451 | 36 | 4.3 |  |
| **Total study population** | **16472** | **20336** | **18404** | **128** | **7.0** |  |

†Data from The MENTOR Initiative records.

**Additional file 1: Table S2.** Incidence of cutaneous leishmaniasis disaggregated by study camp from June 2021 – April 2022 (using 4-months diagnosis cut-off).

|  | **Population December 2020 – before intervention**† | **Population March 2022 – after intervention**† | **Average population during the study follow-up (Dec 2020 to March 2022)** | **New cases of leishmaniasis during the study follow-up (June 2021 to April 2022)** | **Incidence rate per 1,000** | **IRR [95% CI; p-value]** |
| --- | --- | --- | --- | --- | --- | --- |
| **Control arm** | **5412** | **8536** | **6974** | **60** | **8.6** |  |
| Royan Camp | 507 | 2219 | 1363 | 5 | 3.7 |  |
| Sahlat Al Banat Camp | 1387 | 3232 | 2310 | 40 | 17.3 |  |
| Tel Elsamen Camp | 3518 | 3085 | 3302 | 15 | 4.5 |  |
| **Intervention arm** | **11060** | **11800** | **11430** | **55** | **4.8** | **0.56 [0.39 – 0.81]; p=0.002** |
| Tawihena camp | 2538 | 3421 | 2980 | 20 | 6.7 |  |
| Mahmoudli camp | 8522 | 8379 | 8451 | 35 | 4.1 |  |
| **Total study population** | **16472** | **20336** | **18404** | **115** | **6.2** |  |

†Data from The MENTOR Initiative records.

Additional file 1: Table S3. The table provides the recorded density of sandflies and their blood fed status, measured inside the shelters housing study participants in each study camp. In this table we see that the density of both all sandflies and also blood fed sandlfies is significantly greater in control camps than in intervention camps.

**Additional file 1: Table S3.** Density of sandflies collected with indoor CDC light traps disaggregated by study camp from April – December 2021.

| **Study arm and location** | **Number of households with light traps** | **Total number of sandflies** | **Number of female sandflies (%)** | **Number of blood-fed female sandflies (%)** | **Mean of sandflies per household collection (SD)** |
| --- | --- | --- | --- | --- | --- |
| **Control** | 40 | 776 | 463 (59.7) | 126 (27.2) | 2.2 (5.1) |
| Khayala camp | 12 | 191 | 120 (62.8) | 13 (10.8) | 1.6 (3.3) |
| Sahlat Al Banat camp | 12 | 550 | 327 (59.5) | 109 (33.3) | 4.6 (7.6) |
| Tel Elsamen camp | 16 | 35 | 16 (45.7) | 4 (25.0) | 0.2 (0.7) |
| **Intervention** | 40 | 152 | 101 (66.4) | 24 (23.8) | 0.4 (1.3) |
| Tawihena camp | 10 | 99 | 65 (65.7) | 15 (23.1) | 1.0 (2.1) |
| Mahmoudli camp | 30 | 53 | 36 (67.9) | 9 (25.0) | 0.2 (0.6) |
| **Total** | **80** | **928** | **564 (60.8)** | **150 (26.6)** | **1.3 (3.8)** |

Additional file 1. Table S4. The table provides the breakdown of sandflies identified inside shelters in the study camps, by species, blood fed status, gravid or non gravid status, and by total number present. We see that whilst there are five sandflie species identified across the study site, *Phlebotomus papatasi* is the dominant species identified in all study camps.

**Additional file 1. Table S4.** Density of sandflies by genus, species, sex and physiological status collected with indoor CDC light traps disaggregated by study camp from April – December 2021.

| **Study Arm** | **Locality** | **Subgenus** | **Species** | **Female** | | | **Male** | **Total (%)** |
| --- | --- | --- | --- | --- | --- | --- | --- | --- |
|  | | | | **Blood-fed** | **Gravid** | **Total** |  | |
| **Control** | Khayala camp | *Phlebotomus* | *Ph. papatasi* | 12 | 18 | 93 | 71 | 164 (85.86) |
| *Paraphlebotomus* | *Ph. sergenti* | 1 | - | 1 | - | 1 (0.52) |
| *Grassomyia* | *Se. dreyfussi* | - | - | 3 | - | 3 (1.57) |
| *Sergentomyia* | *Se. dentata* | - | - | 21 | 1 | 22 (11.52) |
| *Sintonius* | *Se. cyldei* | - | - | 1 | - | 1 (0.52) |
| Sahlat Al Banat camp | *Phlebotomus* | *Ph. papatasi* | 108 | 68 | 322 | 220 | 542 (98.91) |
| *Sergentomyia* | *S. dentata* | 1 | 2 | 5 | 1 | 6 (1.09) |
| Tel Elsamen camp | *Phlebotomus* | *Ph. papatasi* | 4 | 2 | 15 | 19 | 34 (97.14) |
| *Sergentomyia* | *Se. dentata* | - | - | 1 | - | 1 (2.86) |
| **Intervention** | Tawihena camp | *Phlebotomus* | *Ph. papatasi* | 15 | 30 | 66 | 34 | 100 (99.01) |
| *Sergentomyia* | *Se. dentata* | - | - | 1 | - | 1 (0.99) |
| Mahmoudli camp | *Phlebotomus* | *Ph. papatasi* | 9 | 10 | 36 | 16 | 52 (98.11) |
| *Sergentomyia* | *Se. dentata* | - | - | 1 | - | 1 (1.89) |
|  | **Total** |  |  | **150** | **130** | **566** | **362** | **928** |

**Additional file 1. Table S5.** Blood-meal preferences of Ph. papatasi collected with indoor CDC light traps disaggregated by study camp from April – December 2021.

| **Study arm and location** | **Number of bloodmeals: *homo sapiens*** | **Number of bloodmeals: *Ovis aries*** | **Number of bloodmeals: *Capra* sp.** |
| --- | --- | --- | --- |
| **Control** |  |  |  |
| Khayala camp | 2 | 1 | - |
| Sahlat Al Banat camp | 2 | - | - |
| Tel Elsamen camp | 2 | - | - |
| **Intervention** |  |  |  |
| Tawihena camp | 2 | 1 | 1 |
| Mahmoudli camp | 4 | - | - |
| **Total** | **12** | **2** | **1** |
